# Supplementary material
Source: ML conference proceedings conference paper supplement (https://openaccess.thecvf.com/content/CVPR2025/html/Sain_Sketch_Down_the_CVPR_2025_paper.html)
Supplement: Supplementary file 1 [file Sain_Sketch_Down_the_CVPR_2025_supplemental.zip]

# Supplementary Material for Sketch Down the FLOPs: Towards Efficient Networks for Human Sketch

Aneeshan Sain<sup>1</sup> Subhajit Maity<sup>2\*</sup> Pinaki Nath Chowdhury<sup>1</sup> Shubhadeep Koley<sup>1</sup>  
Ayan Kumar Bhunia<sup>1</sup> Yi-Zhe Song<sup>1</sup>

<sup>1</sup> SketchX, CVSSP, University of Surrey, United Kingdom.

<sup>2</sup> Department of Computer Science, University of Central Florida, United States.

{a.sain, p.chowdhury, s.koley, a.bhunias, y.song}@surrey.ac.uk; Subhajit@ucf.edu

## Further analyses:

Table A. Performance & compute for Transformer-based networks

| Model (on 224×224) | Swin-B | PVT-L  | ViT-B/16 | DeiT-B/16 | CvT-21 |
|--------------------|--------|--------|----------|-----------|--------|
| FLOPs (approx.)    | 15.4G  | 9.8G   | 17.8G    | 17.6G     | 9.2G   |
| Params (approx.)   | 88M    | 61.4M  | 86M      | 87M       | 32M    |
| Top-1 (ShoeV2)     | 40.71% | 44.18% | 16.28%   | 35.62%    | 41.58% |

Table B. Results on transformer-based architectures.

| Model                     | Self (%) | SketchyNetV1 (%) | SketchyNetV2 (%) |
|---------------------------|----------|------------------|------------------|
| SketchPVT [5]             | 44.18    | 43.01            | 42.47            |
| Swin-B [5]                | 40.71    | 38.94            | 38.02            |
| EfficientViT-M5 [4]       | 38.76    | 37.29            | 36.58            |
| SketchAbstract [3]        | 45.31    | 44.06            | 43.59            |
| Partial [6] (full-sketch) | 32.87    | 31.33            | 30.79            |
| ViT [5] / MobileNetV2     | 16.28    | 12.53            | 11.64            |
| ViT [5] / MobileFormer    | 16.28    | 14.86            | 13.65            |

## Generalization to transformers:

Table A shows the Top-1 score on ShoeV2 of popular transformers (trained like [5]), and also experiment (Top-1 on ShoeV2) using suggested methods (from [5]) as teachers and MobileNetV2 as student. To recap, the aim is to *retain the accuracy of the teacher model* in its smaller variants of SketchyNetV1 and SketchyNetV2. Two more experiments use the same teacher of pretrained ViT (trained on Triplet Loss), to train (a) MobileFormer [1] (transformer) and (b) MobileNetV2 (CNN). Tabulated results (Table B) show SketchyNetV2 variants to hold nearly similar accuracy as their teachers, akin to our findings in Table 2, thus validating our method.

**Other ablations and experiments:** (i) While [6] uses deep reinforced attention regression to tackle unnecessary strokes for retrieval from *partial* sketches and [5] explores transformers for accuracy our goal is to deliver the *same* accuracy of a large model at a much *reduced compute* thus addressing the *sparsity* in a sketch. (ii) On varying  $\lambda$  as (0.1, 0.15,  $\dots$  0.9), accuracy falls when  $\lambda > 0.7$  or  $\lambda < 0.45$ , residing optimally at  $\lambda = 0.5$ , thus suggesting an equal impact of triplet loss and KD component.

**Distinguishing our work from [5] for clarity:** While our work might share certain components with [5], it fundamentally differs in motivation, methodology, and novel-

ties: (i) ours is the **first** investigation into efficient sketch networks adapted from photo-based ones. (ii) Unlike [5], which applies KD on fixed-resolution sketches, our novel abstraction-aware canvas-size selector dynamically optimizes sketch resolutions, achieving a 97.92% reduction in FLOPs while retaining accuracy. (iii) Our KD framework uniquely uses sketch features from the teacher, always extracted at *full* resolution, to guide the student operating on *varying* resolutions, invoking **scale invariance**, a property ignored in [5], and crucial for our scenario. (iv) We specifically address the sparsity and abstraction inherent to sketches, while [5] focuses primarily on dense visual representations.

**Miscellaneous:** (i) Compared to MSE or MAE losses, which are prone to noisy outliers, **Huber loss** provides robustness by balancing convergence and stability [2]. It enhances generalization, reducing sensitivity to small deviations and large outliers, particularly benefiting our cross-modal FGSBIR task. (ii) Interestingly, more sketches were downsized for ShoeV2 (22.31% at 128x128, 38.12% to 64x64, 17.64% to 32x32) compared to FSCOCO (16.75% at 128x128, 1.2% to 64x64) dataset, likely because the latter holds much more detailed sketches.

## References

- [1] Yinpeng Chen, Xiyang Dai, Dongdong Chen, Mengchen Liu, Xiaoyi Dong, Lu Yuan, and Zicheng Liu. Mobile-former: Bridging mobilenet and transformer. In *CVPR*, 2022. 1
- [2] Shouyou Huang and Qiang Wu. Robust pairwise learning with huber loss. *Journal of Complexity*, 2021. 1
- [3] Shubhadeep Koley, Ayan Kumar Bhunia, Aneeshan Sain, Pinaki Nath Chowdhury, Tao Xiang, and Yi-Zhe Song. How to handle sketch-abstraction in sketch-based image retrieval? In *CVPR*, 2024. 1
- [4] Xinyu Liu, Houwen Peng, Ningxin Zheng, Yuqing Yang, Han Hu, and Yixuan Yuan. Efficientvit: Memory efficient vision transformer with cascaded group attention. In *CVPR*, 2023. 1
- [5] Aneeshan Sain, Ayan Kumar Bhunia, Shubhadeep Koley, Pinaki Nath Chowdhury, Soumitri Chattopadhyay, Tao Xiang, and Yi-Zhe Song. Exploiting Unlabelled Photos for Stronger Fine-Grained SBIR. In *CVPR*, 2023. 1
- [6] Dingrong Wang, Hitesh Sapkota, Xumin Liu, and Qi Yu. Deep reinforced attention regression for partial sketch based image retrieval. In *ICDM*, 2021. 1

\*Work done as an intern at SketchX before joining UCF.
